# Supplementary figures and images for: Long-term implicit memory for sequential auditory patterns in humans
Source: eLife journal article supplement (doi:10.7554/elife.56073), 2020-05-18

# Exp. 1A: 3REGr

RT advantage for intra-block presentation

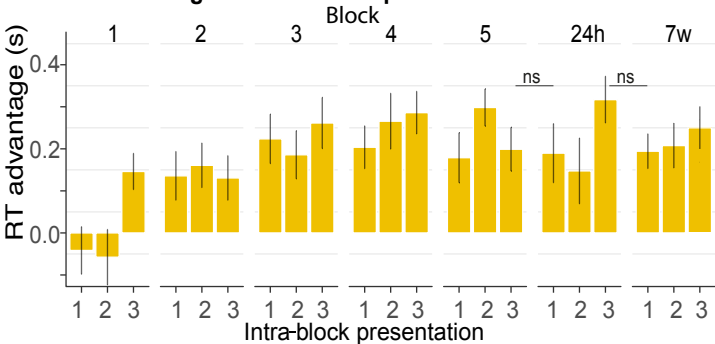

Supplement: supp [file elife_poa_e56073_Figure_2_figure_supplement_1.pdf › elife_poa_e56073_Figure_2_figure_supplement_1.pdf]

# Exp. 1A: 3REGr

## Explicit Memory

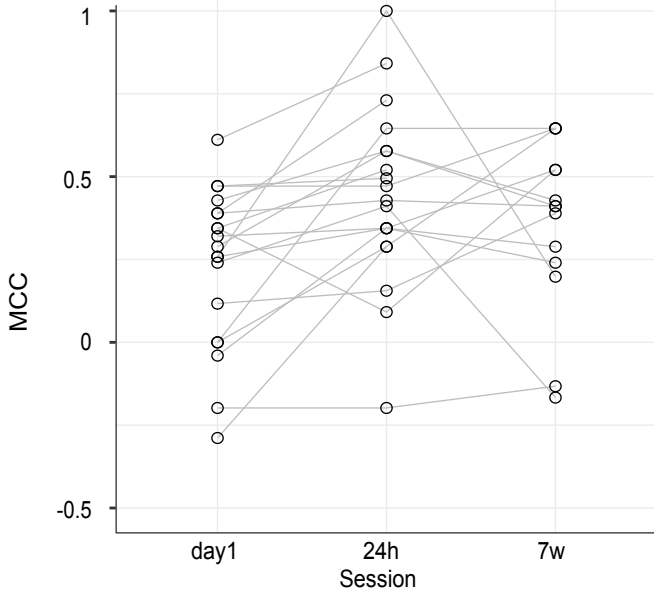

Supplement: supp [file elife_poa_e56073_Figure_2_figure_supplement_2.pdf › elife_poa_e56073_Figure_2_figure_supplement_2.pdf]

# Exp. 1B: time reversal

## RT advantage for intra-block presentation

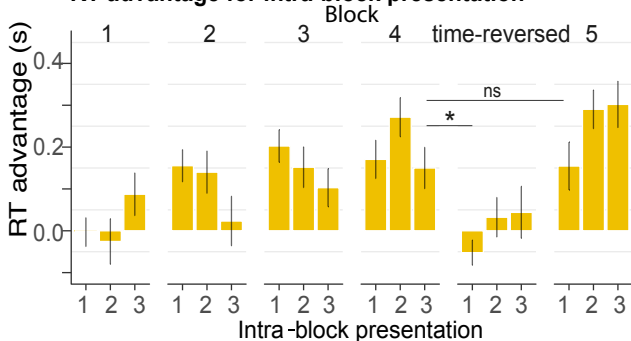

Supplement: supp [file elife_poa_e56073_Figure_2_figure_supplement_3.pdf › elife_poa_e56073_Figure_2_figure_supplement_3.pdf]

### Exp. 3: overwriting

**A** RT advantage for intra-block presentation

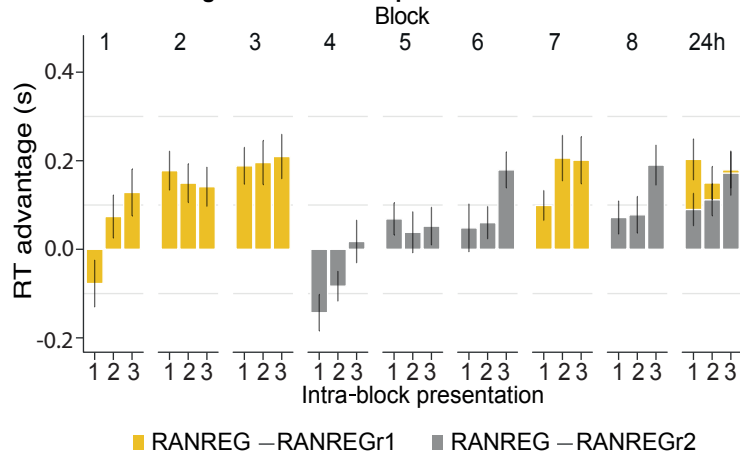

**B** RT across blocks (N=19)

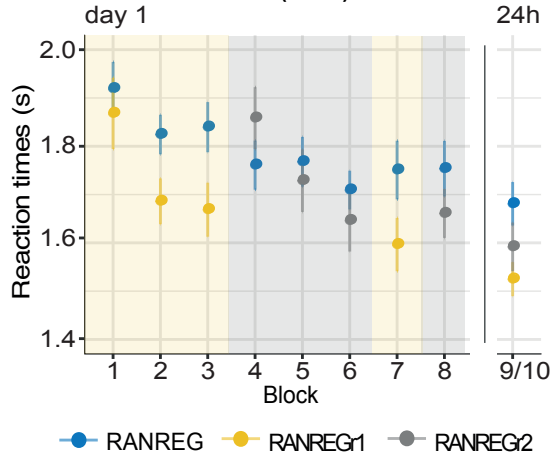

Supplement: supp [file elife_poa_e56073_Figure_6_figure_supplement_1.pdf › elife_poa_e56073_Figure_6_figure_supplement_1.pdf]

## Exp. 4: shiftonset

RT advantage for intra-block presentation

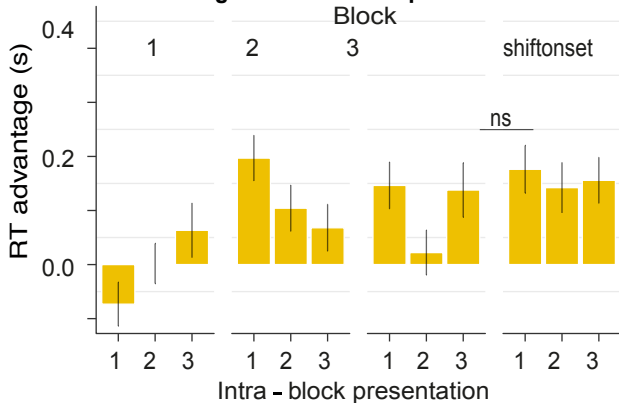

Supplement: supp [file elife_poa_e56073_Figure_7_figure_supplement_1.pdf › elife_poa_e56073_Figure_7_figure_supplement_1.pdf]
